# Supplementary material for: Transformation of carbodiimides to guanidine derivatives facilitated by gallylenes
Source: Royal Society of Chemistry journal article supplement (doi:10.1039/d0cc03270k), 2020-01-01

## checkCIF/PLATON report

Structure factors have been supplied for datablock(s) 4b, 4c, 4d, 5

THIS REPORT IS FOR GUIDANCE ONLY. IF USED AS PART OF A REVIEW PROCEDURE FOR PUBLICATION, IT SHOULD NOT REPLACE THE EXPERTISE OF AN EXPERIENCED CRYSTALLOGRAPHIC REFEREE.

No syntax errors found.      CIF dictionary      Interpreting this report

### Datablock: 4b

---

|                 |                     |                               |
|-----------------|---------------------|-------------------------------|
| Bond precision: | C-C = 0.0087 Å      | Wavelength=0.71073            |
| Cell:           | a=13.499(5)         | b=21.049(8)      c=19.661(7)  |
|                 | alpha=90            | beta=100.305(5)      gamma=90 |
| Temperature:    | 153 K               |                               |
|                 | Calculated          | Reported                      |
| Volume          | 5496(4)             | 5496(4)                       |
| Space group     | P 21/n              | P 21/n                        |
| Hall group      | -P 2yn              | -P 2yn                        |
| Moiety formula  | C54 H88 Ga N6 Na O3 | ?                             |
| Sum formula     | C54 H88 Ga N6 Na O3 | C54 H92 Ga N6 Na O3           |
| Mr              | 962.01              | 966.04                        |
| Dx,g cm-3       | 1.163               | 1.167                         |
| Z               | 4                   | 4                             |
| Mu (mm-1)       | 0.554               | 0.554                         |
| F000            | 2080.0              | 2096.0                        |
| F000'           | 2081.61             |                               |
| h,k,lmax        | 16,25,23            | 16,25,23                      |
| Nref            | 9927                | 9806                          |
| Tmin,Tmax       | 0.895,0.905         | 0.141,0.745                   |
| Tmin'           | 0.895               |                               |

Correction method= # Reported T Limits: Tmin=0.141 Tmax=0.745  
AbsCorr = MULTI-SCAN

Data completeness= 0.988      Theta(max)= 25.229

R(reflections)= 0.0794( 8055)      wR2(reflections)= 0.2123( 9806)

S = 1.164      Npar= 610

---

The following ALERTS were generated. Each ALERT has the format  
**test-name\_ALERT\_alert-type\_alert-level.**  
Click on the hyperlinks for more details of the test.

---

### ● Alert level C

|                   |                                                  |                |              |
|-------------------|--------------------------------------------------|----------------|--------------|
| PLAT041_ALERT_1_C | Calc. and Reported SumFormula                    | Strings Differ | Please Check |
| PLAT043_ALERT_1_C | Calculated and Reported Mol. Weight Differ by .. | 4.03           | Check        |
| PLAT068_ALERT_1_C | Reported F000 Differs from Calcd (or Missing)... |                | Please Check |
| PLAT220_ALERT_2_C | NonSolvent Resd 1 C Ueq(max) / Ueq(min) Range    | 5.2            | Ratio        |
| PLAT222_ALERT_3_C | NonSolvent Resd 1 H Uiso(max)/Uiso(min) Range    | 4.3            | Ratio        |
| PLAT234_ALERT_4_C | Large Hirshfeld Difference C44 --C45             | 0.20           | Ang.         |
| PLAT241_ALERT_2_C | High MainMol Ueq as Compared to Neighbors of     | C43            | Check        |
| PLAT241_ALERT_2_C | High MainMol Ueq as Compared to Neighbors of     | C50            | Check        |
| PLAT242_ALERT_2_C | Low MainMol Ueq as Compared to Neighbors of      | O1             | Check        |
| PLAT329_ALERT_4_C | Carbon Atom Hybridisation Unclear for .....      |                | C45 Check    |
| PLAT329_ALERT_4_C | Carbon Atom Hybridisation Unclear for .....      |                | C46A Check   |
| PLAT341_ALERT_3_C | Low Bond Precision on C-C Bonds .....            | 0.00874        | Ang.         |
| PLAT410_ALERT_2_C | Short Intra H...H Contact H31 ..H34              | 1.91           | Ang.         |
|                   | x,y,z =                                          | 1.555          | Check        |
| PLAT911_ALERT_3_C | Missing FCF Refl Between Thmin & STh/L=          | 0.600          | 121 Report   |
| PLAT975_ALERT_2_C | Check Calcd Resid. Dens. 1.06A From C45A         | 0.66           | eA-3         |
| PLAT977_ALERT_2_C | Check Negative Difference Density on H44A        | -0.36          | eA-3         |
| PLAT977_ALERT_2_C | Check Negative Difference Density on H47B        | -0.32          | eA-3         |
| PLAT977_ALERT_2_C | Check Negative Difference Density on H52A        | -0.33          | eA-3         |

---

### ● Alert level G

FORMU01\_ALERT\_2\_G There is a discrepancy between the atom counts in the  
\_chemical\_formula\_sum and the formula from the \_atom\_site\* data.  
Atom count from \_chemical\_formula\_sum: C54 H92 Ga1 N6 Na1 O3  
Atom count from the \_atom\_site data: C54 H88 Ga1 N6 Na1 O3

CELLZ01\_ALERT\_1\_G Difference between formula and atom\_site contents detected.  
CELLZ01\_ALERT\_1\_G WARNING: H atoms missing from atom site list. Is this intentional?  
From the CIF: \_cell\_formula\_units\_Z 4  
From the CIF: \_chemical\_formula\_sum C54 H92 Ga N6 Na O3  
TEST: Compare cell contents of formula and atom\_site data

| atom | Z*formula | cif sites | diff  |
|------|-----------|-----------|-------|
| C    | 216.00    | 216.00    | 0.00  |
| H    | 368.00    | 352.00    | 16.00 |
| Ga   | 4.00      | 4.00      | 0.00  |
| N    | 24.00     | 24.00     | 0.00  |
| Na   | 4.00      | 4.00      | 0.00  |
| O    | 12.00     | 12.00     | 0.00  |

|                   |                                                  |                   |       |        |
|-------------------|--------------------------------------------------|-------------------|-------|--------|
| PLAT083_ALERT_2_G | SHELXL Second Parameter in WGHT                  | Unusually Large   | 26.67 | Why ?  |
| PLAT171_ALERT_4_G | The CIF-Embedded .res File Contains EADP Records |                   | 2     | Report |
| PLAT300_ALERT_4_G | Atom Site Occupancy of C45                       | Constrained at    | 0.5   | Check  |
| PLAT300_ALERT_4_G | Atom Site Occupancy of C45A                      | Constrained at    | 0.5   | Check  |
| PLAT300_ALERT_4_G | Atom Site Occupancy of C46                       | Constrained at    | 0.5   | Check  |
| PLAT300_ALERT_4_G | Atom Site Occupancy of C46A                      | Constrained at    | 0.5   | Check  |
| PLAT301_ALERT_3_G | Main Residue Disorder .....                      | (Resd 1 )         | 3%    | Note   |
| PLAT367_ALERT_2_G | Long? C(sp?)-C(sp?) Bond C43 - C44               |                   | 1.51  | Ang.   |
| PLAT773_ALERT_2_G | Check long C-C Bond in CIF: C45 --C46A           |                   | 1.85  | Ang.   |
| PLAT773_ALERT_2_G | Check long C-C Bond in CIF: C46 --C45A           |                   | 1.71  | Ang.   |
| PLAT779_ALERT_4_G | Suspect or Irrelevant (Bond) Angle(s) in CIF . # |                   | 222   | Check  |
|                   | C46 -C45 -C46A                                   | 1.555 1.555 1.555 | 26.60 | Deg.   |
| PLAT779_ALERT_4_G | Suspect or Irrelevant (Bond) Angle(s) in CIF . # |                   | 228   | Check  |
|                   | C45 -C46 -C45A                                   | 1.555 1.555 1.555 | 35.30 | Deg.   |
| PLAT779_ALERT_4_G | Suspect or Irrelevant (Bond) Angle(s) in CIF . # |                   | 279   | Check  |
|                   | C46A -C45A -C46                                  | 1.555 1.555 1.555 | 29.30 | Deg.   |
| PLAT779_ALERT_4_G | Suspect or Irrelevant (Bond) Angle(s) in CIF . # |                   | 285   | Check  |
|                   | C45A -C46A -C45                                  | 1.555 1.555 1.555 | 32.60 | Deg.   |
| PLAT779_ALERT_4_G | Suspect or Irrelevant (Bond) Angle(s) in CIF . # |                   | 316   | Check  |
|                   | C46A -O1 -C46                                    | 1.555 1.555 1.555 | 33.30 | Deg.   |
| PLAT909_ALERT_3_G | Percentage of I>2sig(I) Data at Theta(Max) Still |                   | 68%   | Note   |

PLAT933\_ALERT\_2\_G Number of OMIT Records in Embedded .res File ... 6 Note  
 PLAT978\_ALERT\_2\_G Number C-C Bonds with Positive Residual Density. 1 Info

---

0 **ALERT level A** = Most likely a serious problem - resolve or explain  
 0 **ALERT level B** = A potentially serious problem, consider carefully  
 18 **ALERT level C** = Check. Ensure it is not caused by an omission or oversight  
 21 **ALERT level G** = General information/check it is not something unexpected

5 ALERT type 1 CIF construction/syntax error, inconsistent or missing data  
 16 ALERT type 2 Indicator that the structure model may be wrong or deficient  
 5 ALERT type 3 Indicator that the structure quality may be low  
 13 ALERT type 4 Improvement, methodology, query or suggestion  
 0 ALERT type 5 Informative message, check

---

## Datablock: 4c

---

Bond precision: C-C = 0.0090 A Wavelength=0.71073

Cell: a=20.165(5) b=15.683(3) c=22.026(5)  
 alpha=90 beta=109.960(3) gamma=90

Temperature: 153 K

|                | Calculated           | Reported             |
|----------------|----------------------|----------------------|
| Volume         | 6547(3)              | 6547(3)              |
| Space group    | P 21/n               | P 21/n               |
| Hall group     | -P 2yn               | -P 2yn               |
| Moiety formula | C66 H108 Ga N6 Na O3 | ?                    |
| Sum formula    | C66 H108 Ga N6 Na O3 | C66 H108 Ga N6 Na O3 |
| Mr             | 1126.30              | 1126.29              |
| Dx,g cm-3      | 1.143                | 1.143                |
| Z              | 4                    | 4                    |
| Mu (mm-1)      | 0.474                | 0.474                |
| F000           | 2448.0               | 2448.0               |
| F000'          | 2449.73              |                      |
| h,k,lmax       | 23,18,25             | 23,18,25             |
| Nref           | 11209                | 11048                |
| Tmin,Tmax      | 0.892,0.910          | 0.257,0.745          |
| Tmin'          | 0.847                |                      |

Correction method= # Reported T Limits: Tmin=0.257 Tmax=0.745  
 AbsCorr = MULTI-SCAN

Data completeness= 0.986 Theta(max)= 24.761

R(reflections)= 0.0645( 6076) wR2(reflections)= 0.1525( 11048)

S = 1.066 Npar= 706

---

The following ALERTS were generated. Each ALERT has the format

**test-name\_ALERT\_alert-type\_alert-level.**

Click on the hyperlinks for more details of the test.

---

### ● Alert level B

|                   |                           |     |                           |       |       |
|-------------------|---------------------------|-----|---------------------------|-------|-------|
| PLAT220_ALERT_2_B | NonSolvent Resd 1         | C   | Ueq(max) / Ueq(min) Range | 6.5   | Ratio |
| PLAT410_ALERT_2_B | Short Intra H...H Contact | H36 | ..H42                     | 1.88  | Ang.  |
|                   |                           |     | x,y,z =                   | 1_555 | Check |

---

### ● Alert level C

|                   |                                                            |       |                           |         |        |
|-------------------|------------------------------------------------------------|-------|---------------------------|---------|--------|
| THETM01_ALERT_3_C | The value of sine(theta_max)/wavelength is less than 0.590 |       |                           |         |        |
|                   | Calculated sin(theta_max)/wavelength = 0.5893              |       |                           |         |        |
| PLAT222_ALERT_3_C | NonSolvent Resd 1                                          | H     | Uiso(max)/Uiso(min) Range | 6.2     | Ratio  |
| PLAT230_ALERT_2_C | Hirshfeld Test Diff for                                    | C36   | --C37                     | 5.2     | s.u.   |
| PLAT234_ALERT_4_C | Large Hirshfeld Difference                                 | C38   | --C39                     | 0.16    | Ang.   |
| PLAT241_ALERT_2_C | High MainMol Ueq as Compared to Neighbors of               |       |                           | C51     | Check  |
| PLAT241_ALERT_2_C | High MainMol Ueq as Compared to Neighbors of               |       |                           | C53     | Check  |
| PLAT241_ALERT_2_C | High MainMol Ueq as Compared to Neighbors of               |       |                           | C57     | Check  |
| PLAT241_ALERT_2_C | High MainMol Ueq as Compared to Neighbors of               |       |                           | C60     | Check  |
| PLAT241_ALERT_2_C | High MainMol Ueq as Compared to Neighbors of               |       |                           | C61     | Check  |
| PLAT241_ALERT_2_C | High MainMol Ueq as Compared to Neighbors of               |       |                           | C63     | Check  |
| PLAT241_ALERT_2_C | High MainMol Ueq as Compared to Neighbors of               |       |                           | C65     | Check  |
| PLAT242_ALERT_2_C | Low MainMol Ueq as Compared to Neighbors of                |       |                           | 03      | Check  |
| PLAT242_ALERT_2_C | Low MainMol Ueq as Compared to Neighbors of                |       |                           | C14     | Check  |
| PLAT242_ALERT_2_C | Low MainMol Ueq as Compared to Neighbors of                |       |                           | C23     | Check  |
| PLAT242_ALERT_2_C | Low MainMol Ueq as Compared to Neighbors of                |       |                           | C36     | Check  |
| PLAT242_ALERT_2_C | Low MainMol Ueq as Compared to Neighbors of                |       |                           | C42     | Check  |
| PLAT242_ALERT_2_C | Low MainMol Ueq as Compared to Neighbors of                |       |                           | C49     | Check  |
| PLAT242_ALERT_2_C | Low MainMol Ueq as Compared to Neighbors of                |       |                           | C52     | Check  |
| PLAT242_ALERT_2_C | Low MainMol Ueq as Compared to Neighbors of                |       |                           | C59     | Check  |
| PLAT341_ALERT_3_C | Low Bond Precision on C-C Bonds .....                      |       |                           | 0.00898 | Ang.   |
| PLAT360_ALERT_2_C | Short C(sp3)-C(sp3) Bond                                   | C61   | - C62                     | 1.37    | Ang.   |
| PLAT905_ALERT_3_C | Negative K value in the Analysis of Variance ...           |       |                           | -0.495  | Report |
| PLAT911_ALERT_3_C | Missing FCF Refl Between Thmin & STh/L=                    | 0.589 |                           | 158     | Report |
| PLAT978_ALERT_2_C | Number C-C Bonds with Positive Residual Density.           |       |                           | 0       | Info   |

---

### ● Alert level G

|                   |                                                  |                 |      |          |
|-------------------|--------------------------------------------------|-----------------|------|----------|
| PLAT083_ALERT_2_G | SHELXL Second Parameter in WGHT                  | Unusually Large | 8.00 | Why ?    |
| PLAT650_ALERT_4_G | SWAT Instruction Used to Model Solvent Disorder  |                 |      | ! Report |
| PLAT910_ALERT_3_G | Missing # of FCF Reflection(s) Below Theta(Min). |                 |      | 3 Note   |
| PLAT933_ALERT_2_G | Number of OMIT Records in Embedded .res File ... |                 |      | 43 Note  |
| PLAT992_ALERT_5_G | Repd & Actual _reflns_number_gt Values Differ by |                 |      | 2 Check  |

---

- 0 **ALERT level A** = Most likely a serious problem - resolve or explain
- 2 **ALERT level B** = A potentially serious problem, consider carefully
- 24 **ALERT level C** = Check. Ensure it is not caused by an omission or oversight
- 5 **ALERT level G** = General information/check it is not something unexpected

- 0 ALERT type 1 CIF construction/syntax error, inconsistent or missing data
  - 22 ALERT type 2 Indicator that the structure model may be wrong or deficient
  - 6 ALERT type 3 Indicator that the structure quality may be low
  - 2 ALERT type 4 Improvement, methodology, query or suggestion
  - 1 ALERT type 5 Informative message, check
-

# Datablock: 4d

Bond precision: C-C = 0.0082 A Wavelength=0.71073

Cell: a=20.293(12) b=13.197(8) c=26.694(16)  
alpha=90 beta=98.225(8) gamma=90

Temperature: 153 K

|                | Calculated          | Reported            |
|----------------|---------------------|---------------------|
| Volume         | 7075(7)             | 7076(7)             |
| Space group    | P 21/c              | P 21/c              |
| Hall group     | -P 2ybc             | -P 2ybc             |
| Moiety formula | C70 H116 Ga K N6 O4 | ?                   |
| Sum formula    | C70 H116 Ga K N6 O4 | C70 H116 Ga K N6 O4 |
| Mr             | 1214.52             | 1214.50             |
| Dx,g cm-3      | 1.140               | 1.140               |
| Z              | 4                   | 4                   |
| Mu (mm-1)      | 0.496               | 0.496               |
| F000           | 2640.0              | 2640.0              |
| F000'          | 2642.49             |                     |
| h,k,lmax       | 24,15,31            | 24,15,31            |
| Nref           | 12657               | 12467               |
| Tmin,Tmax      | 0.888,0.910         | 0.413,0.745         |
| Tmin'          | 0.883               |                     |

Correction method= # Reported T Limits: Tmin=0.413 Tmax=0.745  
AbsCorr = MULTI-SCAN

Data completeness= 0.985 Theta(max)= 25.140

R(reflections)= 0.0597( 7992) wR2(reflections)= 0.1903( 12467)

S = 1.126 Npar= 749

The following ALERTS were generated. Each ALERT has the format  
**test-name\_ALERT\_alert-type\_alert-level.**  
Click on the hyperlinks for more details of the test.

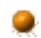

## Alert level B

|                   |                           |     |         |       |           |
|-------------------|---------------------------|-----|---------|-------|-----------|
| PLAT230_ALERT_2_B | Hirshfeld Test Diff for   | O3  | --C66   | .     | 7.2 s.u.  |
| PLAT410_ALERT_2_B | Short Intra H...H Contact | H31 | ..H37   | .     | 1.85 Ang. |
|                   |                           |     | x,y,z = | 1_555 | Check     |

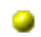

## Alert level C

|                   |                         |     |                     |       |           |
|-------------------|-------------------------|-----|---------------------|-------|-----------|
| PLAT220_ALERT_2_C | NonSolvent Resd 1       | C   | Ueq(max) / Ueq(min) | Range | 4.8 Ratio |
| PLAT222_ALERT_3_C | NonSolvent Resd 1       | H   | Uiso(max)/Uiso(min) | Range | 4.3 Ratio |
| PLAT230_ALERT_2_C | Hirshfeld Test Diff for | C60 | --C61               | .     | 5.6 s.u.  |

|                   |                                                  |       |                    |   |               |
|-------------------|--------------------------------------------------|-------|--------------------|---|---------------|
| PLAT230_ALERT_2_C | Hirshfeld Test Diff for                          | C69   | --C70              | . | 5.3 s.u.      |
| PLAT234_ALERT_4_C | Large Hirshfeld Difference                       | O2    | --C62              | . | 0.17 Ang.     |
| PLAT234_ALERT_4_C | Large Hirshfeld Difference                       | C61   | --C62              | . | 0.21 Ang.     |
| PLAT241_ALERT_2_C | High MainMol Ueq as Compared to Neighbors of     |       |                    |   | O2 Check      |
| PLAT241_ALERT_2_C | High MainMol Ueq as Compared to Neighbors of     |       |                    |   | C47 Check     |
| PLAT241_ALERT_2_C | High MainMol Ueq as Compared to Neighbors of     |       |                    |   | C55 Check     |
| PLAT241_ALERT_2_C | High MainMol Ueq as Compared to Neighbors of     |       |                    |   | C58 Check     |
| PLAT241_ALERT_2_C | High MainMol Ueq as Compared to Neighbors of     |       |                    |   | C62 Check     |
| PLAT241_ALERT_2_C | High MainMol Ueq as Compared to Neighbors of     |       |                    |   | C63 Check     |
| PLAT241_ALERT_2_C | High MainMol Ueq as Compared to Neighbors of     |       |                    |   | C65 Check     |
| PLAT241_ALERT_2_C | High MainMol Ueq as Compared to Neighbors of     |       |                    |   | C66 Check     |
| PLAT241_ALERT_2_C | High MainMol Ueq as Compared to Neighbors of     |       |                    |   | C69 Check     |
| PLAT241_ALERT_2_C | High MainMol Ueq as Compared to Neighbors of     |       |                    |   | C70 Check     |
| PLAT242_ALERT_2_C | Low MainMol Ueq as Compared to Neighbors of      |       |                    |   | K1 Check      |
| PLAT242_ALERT_2_C | Low MainMol Ueq as Compared to Neighbors of      |       |                    |   | O3 Check      |
| PLAT242_ALERT_2_C | Low MainMol Ueq as Compared to Neighbors of      |       |                    |   | O4 Check      |
| PLAT242_ALERT_2_C | Low MainMol Ueq as Compared to Neighbors of      |       |                    |   | C11 Check     |
| PLAT242_ALERT_2_C | Low MainMol Ueq as Compared to Neighbors of      |       |                    |   | C23 Check     |
| PLAT242_ALERT_2_C | Low MainMol Ueq as Compared to Neighbors of      |       |                    |   | C57 Check     |
| PLAT242_ALERT_2_C | Low MainMol Ueq as Compared to Neighbors of      |       |                    |   | C64 Check     |
| PLAT242_ALERT_2_C | Low MainMol Ueq as Compared to Neighbors of      |       |                    |   | C68 Check     |
| PLAT341_ALERT_3_C | Low Bond Precision on C-C Bonds .....            |       |                    |   | 0.00819 Ang.  |
| PLAT360_ALERT_2_C | Short C(sp3)-C(sp3) Bond                         | C55   | - C56              | . | 1.38 Ang.     |
| PLAT360_ALERT_2_C | Short C(sp3)-C(sp3) Bond                         | C57   | - C58              | . | 1.41 Ang.     |
| PLAT360_ALERT_2_C | Short C(sp3)-C(sp3) Bond                         | C60   | - C61              | . | 1.36 Ang.     |
| PLAT360_ALERT_2_C | Short C(sp3)-C(sp3) Bond                         | C64   | - C65              | . | 1.39 Ang.     |
| PLAT360_ALERT_2_C | Short C(sp3)-C(sp3) Bond                         | C67   | - C69              | . | 1.36 Ang.     |
| PLAT411_ALERT_2_C | Short Inter H...H Contact                        | H39B  | ..H69A             | . | 2.05 Ang.     |
|                   |                                                  |       | 1-x,-1/2+y,3/2-z = |   | 2_646 Check   |
| PLAT905_ALERT_3_C | Negative K value in the Analysis of Variance ... |       |                    |   | -2.268 Report |
| PLAT911_ALERT_3_C | Missing FCF Refl Between Thmin & STh/L=          | 0.598 |                    |   | 189 Report    |
| PLAT978_ALERT_2_C | Number C-C Bonds with Positive Residual Density. |       |                    |   | 0 Info        |

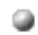

### Alert level G

|                   |                                                  |            |
|-------------------|--------------------------------------------------|------------|
| PLAT779_ALERT_4_G | Suspect or Irrelevant (Bond) Angle(s) in CIF . # | 273 Check  |
|                   | K1 -C53 -H53B 1.555 1.555 1.555                  | 28.50 Deg. |
| PLAT909_ALERT_3_G | Percentage of I>2sig(I) Data at Theta(Max) Still | 32% Note   |
| PLAT910_ALERT_3_G | Missing # of FCF Reflection(s) Below Theta(Min). | 1 Note     |
| PLAT933_ALERT_2_G | Number of OMIT Records in Embedded .res File ... | 9 Note     |

- 
- 0 **ALERT level A** = Most likely a serious problem - resolve or explain
  - 2 **ALERT level B** = A potentially serious problem, consider carefully
  - 34 **ALERT level C** = Check. Ensure it is not caused by an omission or oversight
  - 4 **ALERT level G** = General information/check it is not something unexpected

- 0 ALERT type 1 CIF construction/syntax error, inconsistent or missing data
  - 31 ALERT type 2 Indicator that the structure model may be wrong or deficient
  - 6 ALERT type 3 Indicator that the structure quality may be low
  - 3 ALERT type 4 Improvement, methodology, query or suggestion
  - 0 ALERT type 5 Informative message, check
- 

## Datablock: 5

---

Bond precision: C-C = 0.0085 A

Wavelength=0.71073

Cell: a=13.577(2) b=13.777(2) c=18.806(3)  
 alpha=83.432(2) beta=89.491(2) gamma=89.466(2)  
 Temperature: 123 K

|                        | Calculated                         | Reported            |
|------------------------|------------------------------------|---------------------|
| Volume                 | 3494.3(9)                          | 3494.3(11)          |
| Space group            | P -1                               | P -1                |
| Hall group             | -P 1                               | -P 1                |
| Moiety formula         | C61 H89 Ga N4 Na O2 [+<br>solvent] | ?                   |
| Sum formula            | C61 H89 Ga N4 Na O2 [+<br>solvent] | C68 H98 Ga N4 Na O2 |
| Mr                     | 1003.07                            | 1096.21             |
| Dx, g cm <sup>-3</sup> | 0.953                              | 1.042               |
| Z                      | 2                                  | 2                   |
| Mu (mm <sup>-1</sup> ) | 0.436                              | 0.441               |
| F000                   | 1082.0                             | 1184.0              |
| F000'                  | 1082.82                            |                     |
| h,k,lmax               | 16,16,22                           | 16,16,22            |
| Nref                   | 12323                              | 11929               |
| Tmin,Tmax              | 0.896,0.916                        | 0.439,0.745         |
| Tmin'                  | 0.896                              |                     |

Correction method= # Reported T Limits: Tmin=0.439 Tmax=0.745  
 AbsCorr = MULTI-SCAN

Data completeness= 0.968 Theta(max)= 25.005

R(reflections)= 0.0662( 8830) wR2(reflections)= 0.1658( 11929)

S = 1.170 Npar= 631

The following ALERTS were generated. Each ALERT has the format  
**test-name\_ALERT\_alert-type\_alert-level**.  
 Click on the hyperlinks for more details of the test.

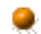

#### Alert level B

|                                                                    |           |
|--------------------------------------------------------------------|-----------|
| PLAT220_ALERT_2_B NonSolvent Resd 1 C Ueq(max) / Ueq(min) Range    | 7.9 Ratio |
| PLAT230_ALERT_2_B Hirshfeld Test Diff for C54 --C55 .              | 7.4 s.u.  |
| PLAT241_ALERT_2_B High MainMol Ueq as Compared to Neighbors of     | C56 Check |
| PLAT241_ALERT_2_B High MainMol Ueq as Compared to Neighbors of     | C58 Check |
| PLAT241_ALERT_2_B High MainMol Ueq as Compared to Neighbors of     | C61 Check |
| PLAT242_ALERT_2_B Low MainMol Ueq as Compared to Neighbors of      | O2 Check  |
| PLAT990_ALERT_1_B Deprecated .res/.hkl Input Style SQUEEZE Job ... | ! Note    |

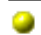

#### Alert level C

|                                                                   |            |
|-------------------------------------------------------------------|------------|
| PLAT029_ALERT_3_C _diffn_measured_fraction_theta_full value Low . | 0.968 Why? |
| PLAT222_ALERT_3_C NonSolvent Resd 1 H Uiso(max)/Uiso(min) Range   | 4.5 Ratio  |
| PLAT234_ALERT_4_C Large Hirshfeld Difference O2 --C61 .           | 0.22 Ang.  |
| PLAT234_ALERT_4_C Large Hirshfeld Difference C14 --C16 .          | 0.18 Ang.  |

|                   |                                                  |       |   |              |
|-------------------|--------------------------------------------------|-------|---|--------------|
| PLAT234_ALERT_4_C | Large Hirshfeld Difference C55                   | --C56 | . | 0.24 Ang.    |
| PLAT234_ALERT_4_C | Large Hirshfeld Difference C56                   | --C57 | . | 0.19 Ang.    |
| PLAT234_ALERT_4_C | Large Hirshfeld Difference C59                   | --C60 | . | 0.21 Ang.    |
| PLAT241_ALERT_2_C | High MainMol Ueq as Compared to Neighbors of     |       |   | C55 Check    |
| PLAT242_ALERT_2_C | Low MainMol Ueq as Compared to Neighbors of      |       |   | Na1 Check    |
| PLAT242_ALERT_2_C | Low MainMol Ueq as Compared to Neighbors of      |       |   | O1 Check     |
| PLAT242_ALERT_2_C | Low MainMol Ueq as Compared to Neighbors of      |       |   | C11 Check    |
| PLAT242_ALERT_2_C | Low MainMol Ueq as Compared to Neighbors of      |       |   | C14 Check    |
| PLAT242_ALERT_2_C | Low MainMol Ueq as Compared to Neighbors of      |       |   | C23 Check    |
| PLAT242_ALERT_2_C | Low MainMol Ueq as Compared to Neighbors of      |       |   | C26 Check    |
| PLAT242_ALERT_2_C | Low MainMol Ueq as Compared to Neighbors of      |       |   | C36 Check    |
| PLAT242_ALERT_2_C | Low MainMol Ueq as Compared to Neighbors of      |       |   | C39 Check    |
| PLAT242_ALERT_2_C | Low MainMol Ueq as Compared to Neighbors of      |       |   | C48 Check    |
| PLAT242_ALERT_2_C | Low MainMol Ueq as Compared to Neighbors of      |       |   | C51 Check    |
| PLAT242_ALERT_2_C | Low MainMol Ueq as Compared to Neighbors of      |       |   | C57 Check    |
| PLAT260_ALERT_2_C | Large Average Ueq of Residue Including           | Ga1   |   | 0.104 Check  |
| PLAT341_ALERT_3_C | Low Bond Precision on C-C Bonds .....            |       |   | 0.00854 Ang. |
| PLAT360_ALERT_2_C | Short C(sp3)-C(sp3) Bond C54                     | - C55 | . | 1.38 Ang.    |
| PLAT360_ALERT_2_C | Short C(sp3)-C(sp3) Bond C55                     | - C56 | . | 1.38 Ang.    |
| PLAT360_ALERT_2_C | Short C(sp3)-C(sp3) Bond C59                     | - C60 | . | 1.42 Ang.    |
| PLAT360_ALERT_2_C | Short C(sp3)-C(sp3) Bond C60                     | - C61 | . | 1.42 Ang.    |
| PLAT911_ALERT_3_C | Missing FCF Refl Between Thmin & Sth/L=          | 0.595 |   | 392 Report   |
| PLAT918_ALERT_3_C | Reflection(s) with I(obs) much Smaller I(calc)   |       |   | 2 Check      |
| PLAT934_ALERT_3_C | Number of (Iobs-Icalc)/Sigma(W) > 10 Outliers .. |       |   | 1 Check      |
| PLAT977_ALERT_2_C | Check Negative Difference Density on H61A        |       |   | -0.32 eA-3   |
| PLAT977_ALERT_2_C | Check Negative Difference Density on H61B        |       |   | -0.36 eA-3   |
| PLAT978_ALERT_2_C | Number C-C Bonds with Positive Residual Density. |       |   | 0 Info       |

## Alert level G

FORMU01\_ALERT\_2\_G There is a discrepancy between the atom counts in the  
\_chemical\_formula\_sum and the formula from the \_atom\_site\* data.

Atom count from \_chemical\_formula\_sum: C68 H98 Ga1 N4 Na1 O2

Atom count from the \_atom\_site data: C61 H89 Ga1 N4 Na1 O2

CELLZ01\_ALERT\_1\_G Difference between formula and atom\_site contents detected.

CELLZ01\_ALERT\_1\_G ALERT: Large difference may be due to a

symmetry error - see SYMMG tests

From the CIF: \_cell\_formula\_units\_Z 2

From the CIF: \_chemical\_formula\_sum C68 H98 Ga N4 Na O2

TEST: Compare cell contents of formula and atom\_site data

| atom | Z*formula | cif sites | diff  |
|------|-----------|-----------|-------|
| C    | 136.00    | 122.00    | 14.00 |
| H    | 196.00    | 178.00    | 18.00 |
| Ga   | 2.00      | 2.00      | 0.00  |
| N    | 8.00      | 8.00      | 0.00  |
| Na   | 2.00      | 2.00      | 0.00  |
| O    | 4.00      | 4.00      | 0.00  |

|                   |                                                    |              |
|-------------------|----------------------------------------------------|--------------|
| PLAT013_ALERT_1_G | N.O.K. _shelx_hkl_checksum Found in CIF .....      | Please Check |
| PLAT041_ALERT_1_G | Calc. and Reported SumFormula Strings Differ       | Please Check |
| PLAT068_ALERT_1_G | Reported F000 Differs from Calcd (or Missing)...   | Please Check |
| PLAT152_ALERT_1_G | The Supplied and Calc. Volume s.u. Differ by ...   | -2 Units     |
| PLAT154_ALERT_1_G | The s.u.'s on the Cell Angles are Equal ..(Note)   | 0.002 Degree |
| PLAT171_ALERT_4_G | The CIF-Embedded .res File Contains EADP Records   | 1 Report     |
| PLAT606_ALERT_4_G | VERY LARGE Solvent Accessible VOID(S) in Structure | ! Info       |
| PLAT869_ALERT_4_G | ALERTS Related to the Use of SQUEEZE Suppressed    | ! Info       |
| PLAT909_ALERT_3_G | Percentage of I>2sig(I) Data at Theta(Max) Still   | 49% Note     |
| PLAT910_ALERT_3_G | Missing # of FCF Reflection(s) Below Theta(Min).   | 3 Note       |
| PLAT933_ALERT_2_G | Number of OMIT Records in Embedded .res File ...   | 9 Note       |
| PLAT961_ALERT_5_G | Dataset Contains no Negative Intensities .....     | Please Check |
| PLAT992_ALERT_5_G | Repd & Actual _reflns_number_gt Values Differ by   | 1 Check      |



---

|    |                      |                                                              |
|----|----------------------|--------------------------------------------------------------|
| 0  | <b>ALERT level A</b> | = Most likely a serious problem - resolve or explain         |
| 7  | <b>ALERT level B</b> | = A potentially serious problem, consider carefully          |
| 31 | <b>ALERT level C</b> | = Check. Ensure it is not caused by an omission or oversight |
| 16 | <b>ALERT level G</b> | = General information/check it is not something unexpected   |
|    |                      |                                                              |
| 8  | ALERT type 1         | CIF construction/syntax error, inconsistent or missing data  |
| 28 | ALERT type 2         | Indicator that the structure model may be wrong or deficient |
| 8  | ALERT type 3         | Indicator that the structure quality may be low              |
| 8  | ALERT type 4         | Improvement, methodology, query or suggestion                |
| 2  | ALERT type 5         | Informative message, check                                   |

---

It is advisable to attempt to resolve as many as possible of the alerts in all categories. Often the minor alerts point to easily fixed oversights, errors and omissions in your CIF or refinement strategy, so attention to these fine details can be worthwhile. In order to resolve some of the more serious problems it may be necessary to carry out additional measurements or structure refinements. However, the purpose of your study may justify the reported deviations and the more serious of these should normally be commented upon in the discussion or experimental section of a paper or in the "special\_details" fields of the CIF. checkCIF was carefully designed to identify outliers and unusual parameters, but every test has its limitations and alerts that are not important in a particular case may appear. Conversely, the absence of alerts does not guarantee there are no aspects of the results needing attention. It is up to the individual to critically assess their own results and, if necessary, seek expert advice.

### **Publication of your CIF in IUCr journals**

A basic structural check has been run on your CIF. These basic checks will be run on all CIFs submitted for publication in IUCr journals (*Acta Crystallographica*, *Journal of Applied Crystallography*, *Journal of Synchrotron Radiation*); however, if you intend to submit to *Acta Crystallographica Section C* or *E* or *IUCrData*, you should make sure that full publication checks are run on the final version of your CIF prior to submission.

### **Publication of your CIF in other journals**

Please refer to the *Notes for Authors* of the relevant journal for any special instructions relating to CIF submission.

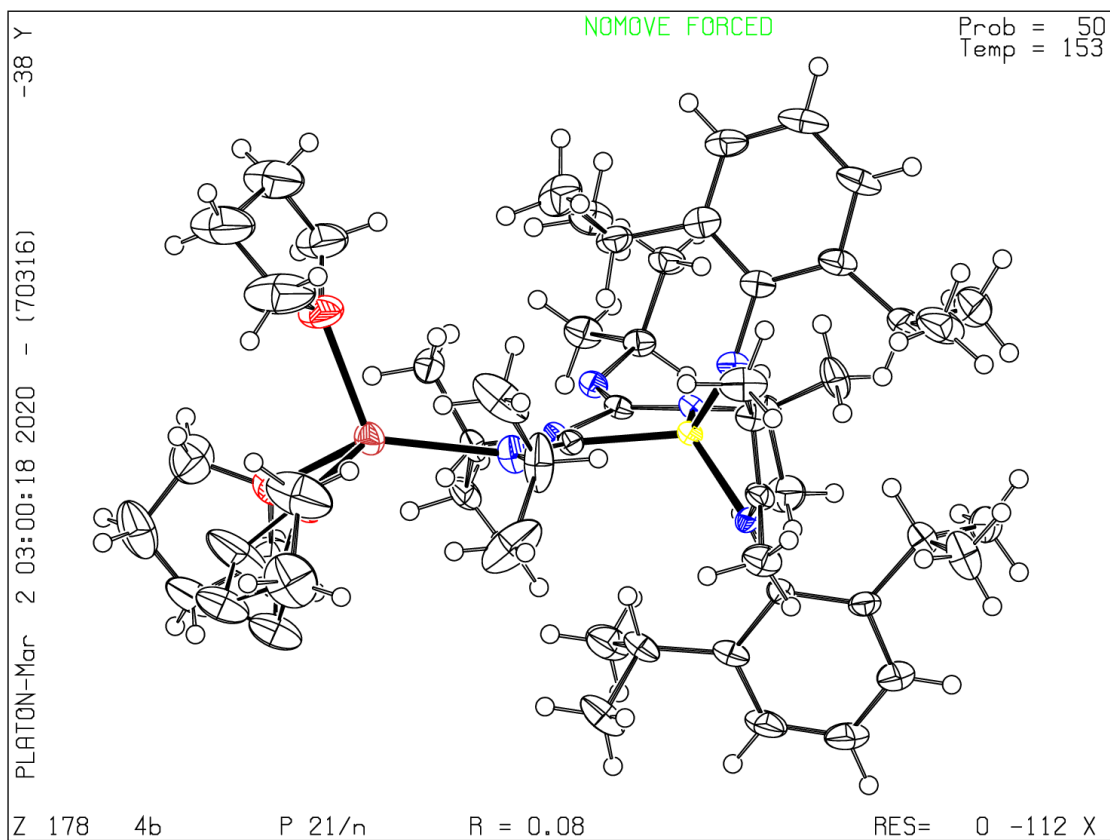

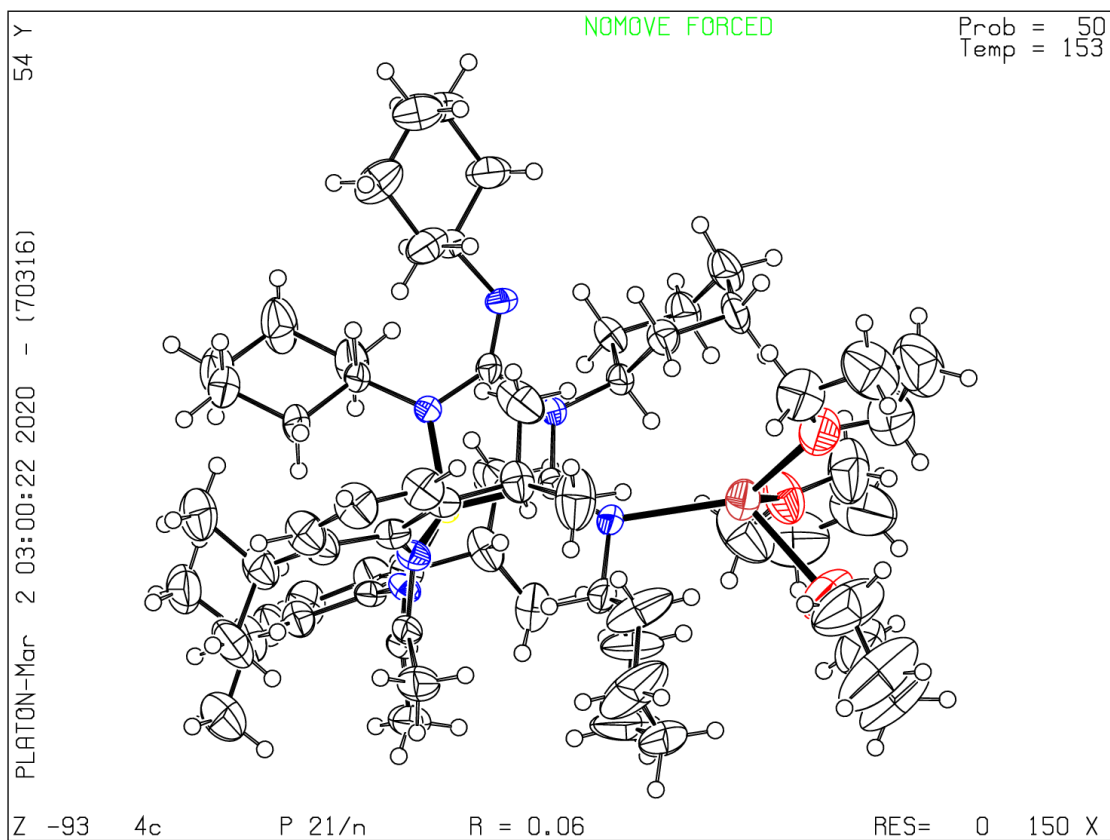

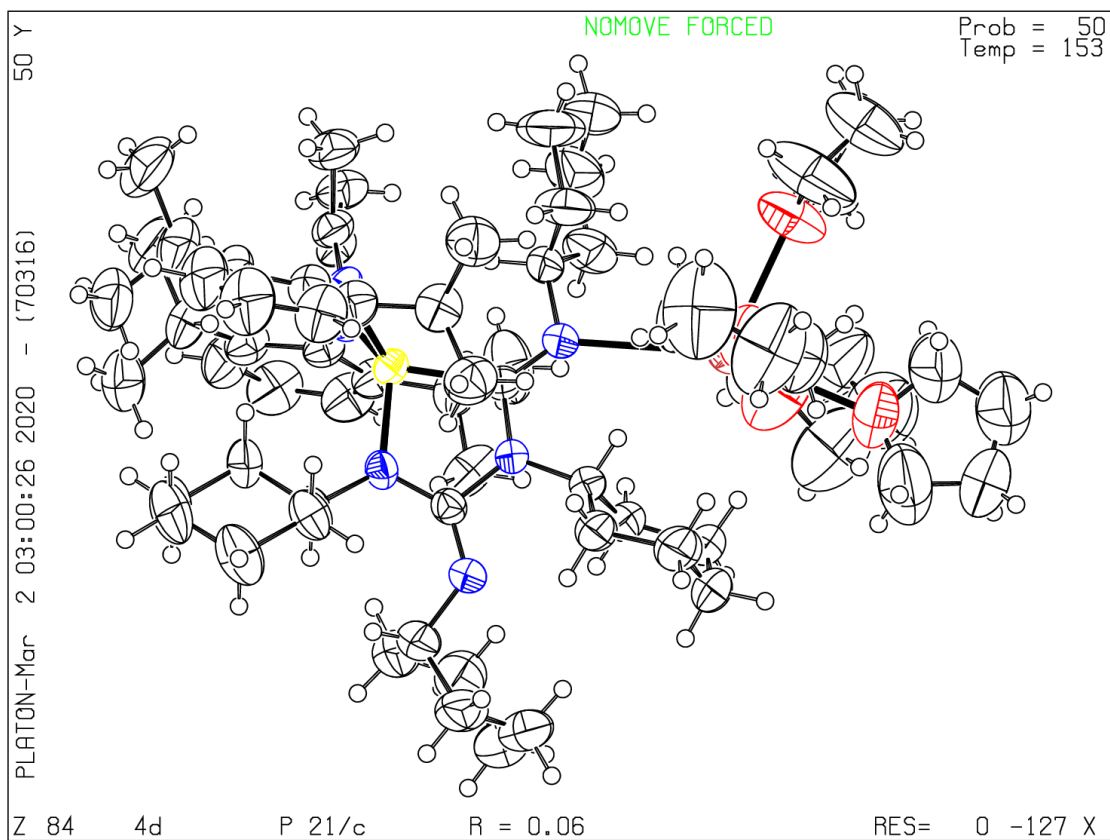

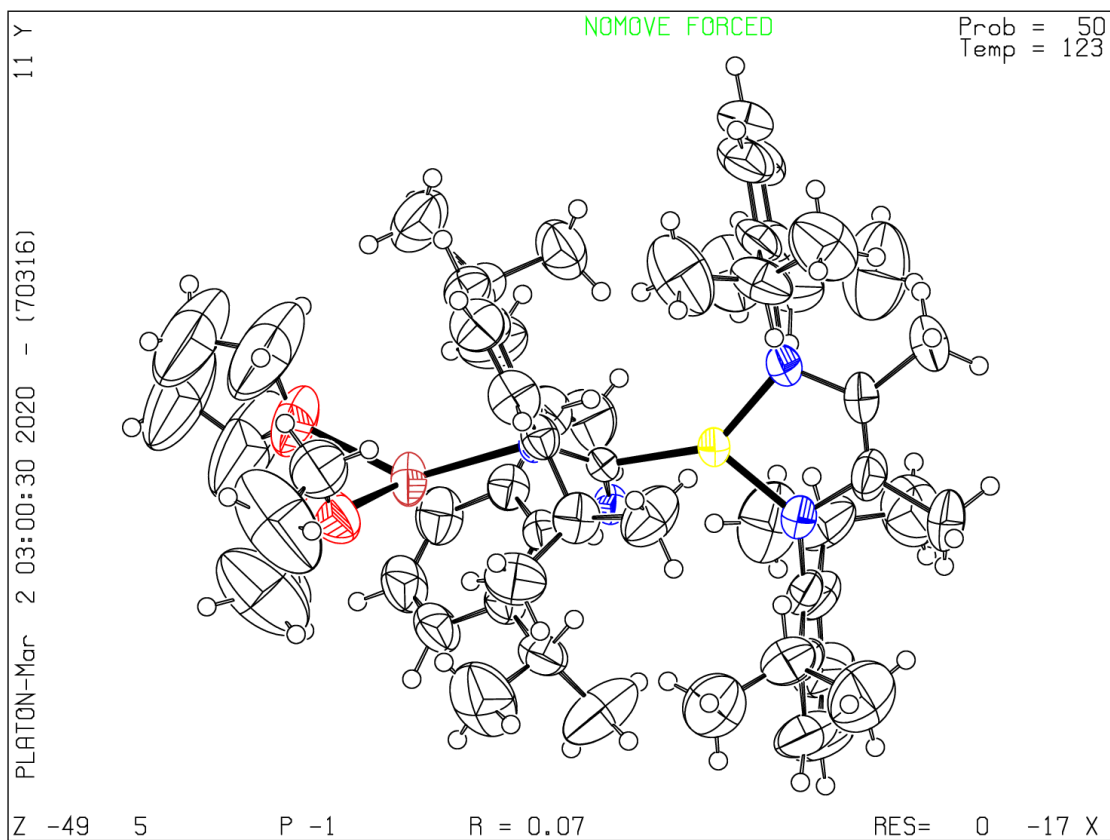

Supplement: d0cc03270k2.pdf [file d0cc03270k2.pdf]
