# Supplementary material for: Transformation of carbodiimides to guanidine derivatives facilitated by gallylenes
Source: Royal Society of Chemistry journal article supplement (doi:10.1039/d0cc03270k), 2020-01-01

## checkCIF/PLATON report

You have not supplied any structure factors. As a result the full set of tests cannot be run.

THIS REPORT IS FOR GUIDANCE ONLY. IF USED AS PART OF A REVIEW PROCEDURE FOR PUBLICATION, IT SHOULD NOT REPLACE THE EXPERTISE OF AN EXPERIENCED CRYSTALLOGRAPHIC REFEREE.

No syntax errors found.      CIF dictionary      Interpreting this report

### Datablock: nagabian1m

---

|                        |                                        |                         |              |
|------------------------|----------------------------------------|-------------------------|--------------|
| Bond precision:        | C-C = 0.0051 Å                         | Wavelength=0.71073      |              |
| Cell:                  | a=13.7910(5)                           | b=36.8339(13)           | c=15.0725(5) |
|                        | alpha=90                               | beta=93.043(1)          | gamma=90     |
| Temperature:           | 100 K                                  |                         |              |
|                        | Calculated                             | Reported                |              |
| Volume                 | 7645.7(5)                              | 7645.7(5)               |              |
| Space group            | P 21/c                                 | P 21/c                  |              |
| Hall group             | -P 2ybc                                | -P 2ybc                 |              |
|                        | C62 H84 Ga N6, C12 H30 Na              |                         |              |
| Moiety formula         | O6, 0.51(C4 H10 O2),<br>0.49(C4 H10 O) | ?                       |              |
| Sum formula            | C78 H124 Ga N6 Na O7.51                | C78 H124 Ga N6 Na O7.51 |              |
| Mr                     | 1358.70                                | 1358.69                 |              |
| Dx, g cm <sup>-3</sup> | 1.180                                  | 1.180                   |              |
| Z                      | 4                                      | 4                       |              |
| Mu (mm <sup>-1</sup> ) | 0.421                                  | 0.421                   |              |
| F000                   | 2944.3                                 | 2944.0                  |              |
| F000'                  | 2946.34                                |                         |              |
| h,k,lmax               | 18,48,19                               | 18,48,19                |              |
| Nref                   | 18454                                  | 18399                   |              |
| Tmin,Tmax              | 0.862,0.887                            | 0.794,0.901             |              |
| Tmin'                  | 0.862                                  |                         |              |

Correction method= # Reported T Limits: Tmin=0.794 Tmax=0.901  
AbsCorr = MULTI-SCAN

Data completeness= 0.997      Theta(max)= 27.999

R(reflections)= 0.0709( 12900)      wR2(reflections)= 0.1990( 18399)

S = 1.074      Npar= 1130

---

The following ALERTS were generated. Each ALERT has the format

**test-name\_ALERT\_alert-type\_alert-level.**

Click on the hyperlinks for more details of the test.

### ● Alert level C

|                   |                                              |                           |             |
|-------------------|----------------------------------------------|---------------------------|-------------|
| PLAT220_ALERT_2_C | NonSolvent Resd 1 C                          | Ueq(max) / Ueq(min) Range | 3.2 Ratio   |
| PLAT221_ALERT_2_C | Solv./Anion Resd 3 C                         | Ueq(max)/Ueq(min) Range   | 6.0 Ratio   |
| PLAT221_ALERT_2_C | Solv./Anion Resd 6 C                         | Ueq(max)/Ueq(min) Range   | 4.6 Ratio   |
| PLAT223_ALERT_4_C | Solv./Anion Resd 3 H                         | Ueq(max)/Ueq(min) Range   | 7.4 Ratio   |
| PLAT223_ALERT_4_C | Solv./Anion Resd 6 H                         | Ueq(max)/Ueq(min) Range   | 5.8 Ratio   |
| PLAT230_ALERT_2_C | Hirshfeld Test Diff for C39                  | --C44 .                   | 5.5 s.u.    |
| PLAT241_ALERT_2_C | High MainMol Ueq as Compared to Neighbors of | C53                       | Check       |
| PLAT260_ALERT_2_C | Large Average Ueq of Residue Including       | NalQ                      | 0.101 Check |
| PLAT260_ALERT_2_C | Large Average Ueq of Residue Including       | O7Q                       | 0.193 Check |
| PLAT260_ALERT_2_C | Large Average Ueq of Residue Including       | O7W                       | 0.180 Check |
| PLAT410_ALERT_2_C | Short Intra H...H Contact H39A               | ..H45A .                  | 1.90 Ang.   |
|                   |                                              | x,y,z =                   | 1_555 Check |

### ● Alert level G

|                   |                                                  |       |                      |
|-------------------|--------------------------------------------------|-------|----------------------|
| PLAT002_ALERT_2_G | Number of Distance or Angle Restraints on AtSite | 52    | Note                 |
| PLAT003_ALERT_2_G | Number of Uiso or Uij Restrained non-H Atoms ... | 57    | Report               |
| PLAT012_ALERT_1_G | N.O.K. _shelx_res_checksum Found in CIF .....    |       | Please Check         |
| PLAT068_ALERT_1_G | Reported F000 Differs from Calcd (or Missing)... |       | Please Check         |
| PLAT083_ALERT_2_G | SHELXL Second Parameter in WGHT Unusually Large  | 7.01  | Why ?                |
| PLAT172_ALERT_4_G | The CIF-Embedded .res File Contains DFIX Records | 20    | Report               |
| PLAT186_ALERT_4_G | The CIF-Embedded .res File Contains ISOR Records | 2     | Report               |
| PLAT300_ALERT_4_G | Atom Site Occupancy of O7S                       | 0.51  | Constrained at Check |
| PLAT300_ALERT_4_G | Atom Site Occupancy of O8S                       | 0.51  | Constrained at Check |
| PLAT300_ALERT_4_G | Atom Site Occupancy of Cl3S                      | 0.51  | Constrained at Check |
| PLAT300_ALERT_4_G | Atom Site Occupancy of Cl4S                      | 0.51  | Constrained at Check |
| PLAT300_ALERT_4_G | Atom Site Occupancy of Cl5S                      | 0.51  | Constrained at Check |
| PLAT300_ALERT_4_G | Atom Site Occupancy of Cl6S                      | 0.51  | Constrained at Check |
| PLAT300_ALERT_4_G | Atom Site Occupancy of H13A                      | 0.51  | Constrained at Check |
| PLAT300_ALERT_4_G | Atom Site Occupancy of H13B                      | 0.51  | Constrained at Check |
| PLAT300_ALERT_4_G | Atom Site Occupancy of H13C                      | 0.51  | Constrained at Check |
| PLAT300_ALERT_4_G | Atom Site Occupancy of H14A                      | 0.51  | Constrained at Check |
| PLAT300_ALERT_4_G | Atom Site Occupancy of H14B                      | 0.51  | Constrained at Check |
| PLAT300_ALERT_4_G | Atom Site Occupancy of H15B                      | 0.51  | Constrained at Check |
| PLAT300_ALERT_4_G | Atom Site Occupancy of H15C                      | 0.51  | Constrained at Check |
| PLAT300_ALERT_4_G | Atom Site Occupancy of H16B                      | 0.51  | Constrained at Check |
| PLAT300_ALERT_4_G | Atom Site Occupancy of H16C                      | 0.51  | Constrained at Check |
| PLAT300_ALERT_4_G | Atom Site Occupancy of H16D                      | 0.51  | Constrained at Check |
| PLAT300_ALERT_4_G | Atom Site Occupancy of O7Q                       | 0.295 | Constrained at Check |
| PLAT300_ALERT_4_G | Atom Site Occupancy of Cl3Q                      | 0.295 | Constrained at Check |
| PLAT300_ALERT_4_G | Atom Site Occupancy of Cl4Q                      | 0.295 | Constrained at Check |
| PLAT300_ALERT_4_G | Atom Site Occupancy of Cl5Q                      | 0.295 | Constrained at Check |
| PLAT300_ALERT_4_G | Atom Site Occupancy of Cl6Q                      | 0.295 | Constrained at Check |
| PLAT300_ALERT_4_G | Atom Site Occupancy of H13D                      | 0.295 | Constrained at Check |
| PLAT300_ALERT_4_G | Atom Site Occupancy of H13G                      | 0.295 | Constrained at Check |
| PLAT300_ALERT_4_G | Atom Site Occupancy of H14C                      | 0.295 | Constrained at Check |
| PLAT300_ALERT_4_G | Atom Site Occupancy of H14D                      | 0.295 | Constrained at Check |
| PLAT300_ALERT_4_G | Atom Site Occupancy of H14E                      | 0.295 | Constrained at Check |
| PLAT300_ALERT_4_G | Atom Site Occupancy of H15D                      | 0.295 | Constrained at Check |
| PLAT300_ALERT_4_G | Atom Site Occupancy of H15E                      | 0.295 | Constrained at Check |
| PLAT300_ALERT_4_G | Atom Site Occupancy of H16E                      | 0.295 | Constrained at Check |
| PLAT300_ALERT_4_G | Atom Site Occupancy of H16F                      | 0.295 | Constrained at Check |
| PLAT300_ALERT_4_G | Atom Site Occupancy of H16G                      | 0.295 | Constrained at Check |
| PLAT300_ALERT_4_G | Atom Site Occupancy of O7W                       | 0.195 | Constrained at Check |
| PLAT300_ALERT_4_G | Atom Site Occupancy of Cl3W                      | 0.195 | Constrained at Check |

|                   |                                                  |                |       |        |
|-------------------|--------------------------------------------------|----------------|-------|--------|
| PLAT300_ALERT_4_G | Atom Site Occupancy of C14W                      | Constrained at | 0.195 | Check  |
| PLAT300_ALERT_4_G | Atom Site Occupancy of C15W                      | Constrained at | 0.195 | Check  |
| PLAT300_ALERT_4_G | Atom Site Occupancy of C16W                      | Constrained at | 0.195 | Check  |
| PLAT300_ALERT_4_G | Atom Site Occupancy of H13E                      | Constrained at | 0.195 | Check  |
| PLAT300_ALERT_4_G | Atom Site Occupancy of H13F                      | Constrained at | 0.195 | Check  |
| PLAT300_ALERT_4_G | Atom Site Occupancy of H14F                      | Constrained at | 0.195 | Check  |
| PLAT300_ALERT_4_G | Atom Site Occupancy of H14G                      | Constrained at | 0.195 | Check  |
| PLAT300_ALERT_4_G | Atom Site Occupancy of H14H                      | Constrained at | 0.195 | Check  |
| PLAT300_ALERT_4_G | Atom Site Occupancy of H15F                      | Constrained at | 0.195 | Check  |
| PLAT300_ALERT_4_G | Atom Site Occupancy of H15G                      | Constrained at | 0.195 | Check  |
| PLAT300_ALERT_4_G | Atom Site Occupancy of H16H                      | Constrained at | 0.195 | Check  |
| PLAT300_ALERT_4_G | Atom Site Occupancy of H16I                      | Constrained at | 0.195 | Check  |
| PLAT300_ALERT_4_G | Atom Site Occupancy of H16J                      | Constrained at | 0.195 | Check  |
| PLAT302_ALERT_4_G | Anion/Solvent/Minor-Residue Disorder (Resd 2 )   |                | 100%  | Note   |
| PLAT302_ALERT_4_G | Anion/Solvent/Minor-Residue Disorder (Resd 3 )   |                | 100%  | Note   |
| PLAT302_ALERT_4_G | Anion/Solvent/Minor-Residue Disorder (Resd 4 )   |                | 100%  | Note   |
| PLAT302_ALERT_4_G | Anion/Solvent/Minor-Residue Disorder (Resd 5 )   |                | 100%  | Note   |
| PLAT302_ALERT_4_G | Anion/Solvent/Minor-Residue Disorder (Resd 6 )   |                | 100%  | Note   |
| PLAT304_ALERT_4_G | Non-Integer Number of Atoms in ..... (Resd 2 )   |                | 27.49 | Check  |
| PLAT304_ALERT_4_G | Non-Integer Number of Atoms in ..... (Resd 3 )   |                | 21.51 | Check  |
| PLAT304_ALERT_4_G | Non-Integer Number of Atoms in ..... (Resd 4 )   |                | 8.16  | Check  |
| PLAT304_ALERT_4_G | Non-Integer Number of Atoms in ..... (Resd 5 )   |                | 4.43  | Check  |
| PLAT304_ALERT_4_G | Non-Integer Number of Atoms in ..... (Resd 6 )   |                | 2.92  | Check  |
| PLAT398_ALERT_2_G | Deviating C-O-C Angle From 120 for O7S           |                | 107.9 | Degree |
| PLAT398_ALERT_2_G | Deviating C-O-C Angle From 120 for O8S           |                | 109.0 | Degree |
| PLAT398_ALERT_2_G | Deviating C-O-C Angle From 120 for O7Q           |                | 109.3 | Degree |
| PLAT398_ALERT_2_G | Deviating C-O-C Angle From 120 for O7W           |                | 106.7 | Degree |
| PLAT411_ALERT_2_G | Short Inter H...H Contact H6SB ..H46A .          |                | 2.02  | Ang.   |
|                   |                                                  | x,y,z =        | 1_555 | Check  |
| PLAT411_ALERT_2_G | Short Inter H...H Contact H7SB ..H46A .          |                | 1.96  | Ang.   |
|                   |                                                  | x,y,z =        | 1_555 | Check  |
| PLAT413_ALERT_2_G | Short Inter XH3 .. XHn H1SB ..H53B .             |                | 2.07  | Ang.   |
|                   |                                                  | 1-x,1-y,1-z =  | 3_666 | Check  |
| PLAT720_ALERT_4_G | Number of Unusual/Non-Standard Labels .....      |                | 46    | Note   |
| PLAT722_ALERT_1_G | Angle Calc 110.00, Rep 111.40 Dev...             |                | 1.40  | Degree |
|                   | C14W -C13W -H13F 1.555 1.555 1.555 #             |                | 635   | Check  |
| PLAT722_ALERT_1_G | Angle Calc 108.00, Rep 109.50 Dev...             |                | 1.50  | Degree |
|                   | H14F -C14W -H14G 1.555 1.555 1.555 #             |                | 639   | Check  |
| PLAT811_ALERT_5_G | No ADDSYM Analysis: Too Many Excluded Atoms .... |                | !     | Info   |
| PLAT860_ALERT_3_G | Number of Least-Squares Restraints .....         |                | 387   | Note   |
| PLAT933_ALERT_2_G | Number of OMIT Records in Embedded .res File ... |                | 47    | Note   |

---

0 **ALERT level A** = Most likely a serious problem - resolve or explain  
 0 **ALERT level B** = A potentially serious problem, consider carefully  
 11 **ALERT level C** = Check. Ensure it is not caused by an omission or oversight  
 76 **ALERT level G** = General information/check it is not something unexpected

4 **ALERT type 1** CIF construction/syntax error, inconsistent or missing data  
 20 **ALERT type 2** Indicator that the structure model may be wrong or deficient  
 1 **ALERT type 3** Indicator that the structure quality may be low  
 61 **ALERT type 4** Improvement, methodology, query or suggestion  
 1 **ALERT type 5** Informative message, check

---



---

It is advisable to attempt to resolve as many as possible of the alerts in all categories. Often the minor alerts point to easily fixed oversights, errors and omissions in your CIF or refinement strategy, so attention to these fine details can be worthwhile. In order to resolve some of the more serious problems it may be necessary to carry out additional measurements or structure refinements. However, the purpose of your study may justify the reported deviations and the more serious of these should normally be commented upon in the discussion or experimental section of a paper or in the "special\_details" fields of the CIF. checkCIF was carefully designed to identify outliers and unusual parameters, but every test has its limitations and alerts that are not important in a particular case may appear. Conversely, the absence of alerts does not guarantee there are no aspects of the results needing attention. It is up to the individual to critically assess their own results and, if necessary, seek expert advice.

### **Publication of your CIF in IUCr journals**

A basic structural check has been run on your CIF. These basic checks will be run on all CIFs submitted for publication in IUCr journals (*Acta Crystallographica*, *Journal of Applied Crystallography*, *Journal of Synchrotron Radiation*); however, if you intend to submit to *Acta Crystallographica Section C* or *E* or *IUCrData*, you should make sure that full publication checks are run on the final version of your CIF prior to submission.

### **Publication of your CIF in other journals**

Please refer to the *Notes for Authors* of the relevant journal for any special instructions relating to CIF submission.

---

**PLATON version of 22/12/2019; check.def file version of 13/12/2019**

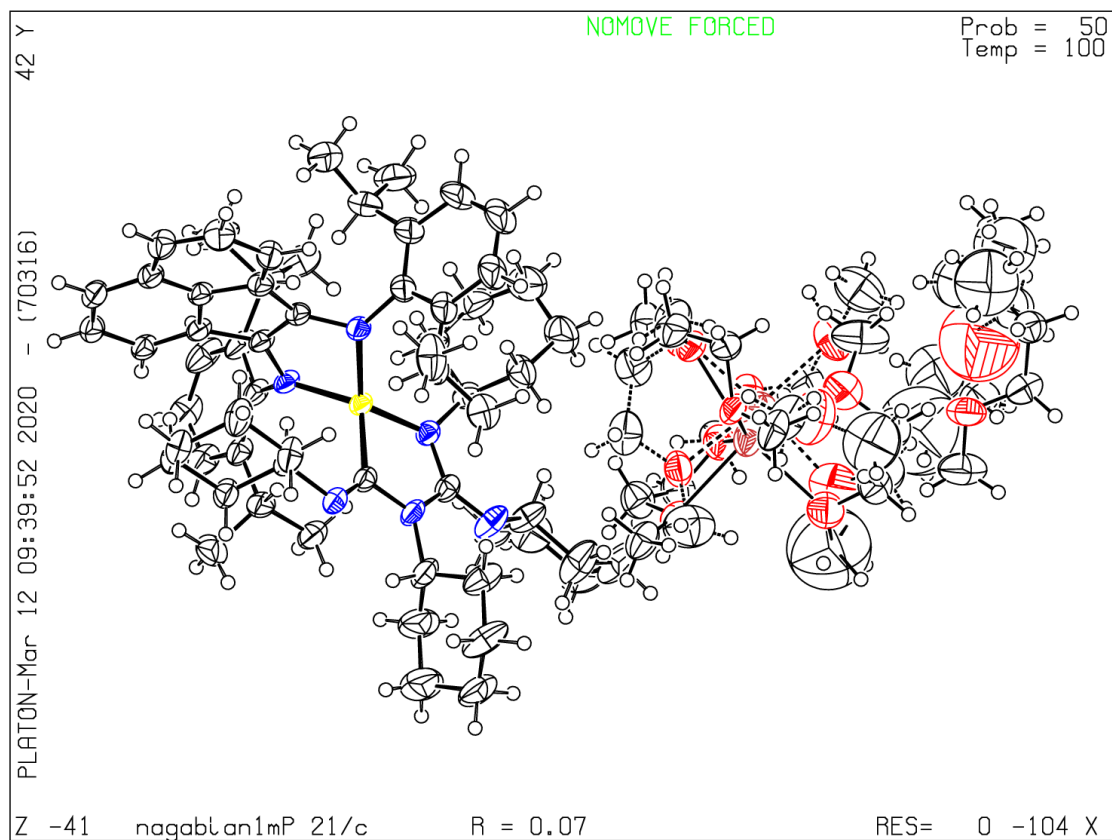

Supplement: d0cc03270k3.pdf [file d0cc03270k3.pdf]
