# Supplementary material for: Transformation of carbodiimides to guanidine derivatives facilitated by gallylenes
Source: Royal Society of Chemistry journal article supplement (doi:10.1039/d0cc03270k), 2020-01-01

## checkCIF/PLATON report

You have not supplied any structure factors. As a result the full set of tests cannot be run.

THIS REPORT IS FOR GUIDANCE ONLY. IF USED AS PART OF A REVIEW PROCEDURE FOR PUBLICATION, IT SHOULD NOT REPLACE THE EXPERTISE OF AN EXPERIENCED CRYSTALLOGRAPHIC REFEREE.

No syntax errors found.      CIF dictionary      Interpreting this report

## Datablock: dppbianganancn

---

|                 |                              |                     |             |
|-----------------|------------------------------|---------------------|-------------|
| Bond precision: | C-C = 0.0131 Å               | Wavelength=0.71073  |             |
| Cell:           | a=13.7559(16)                | b=18.926(2)         | c=24.235(3) |
|                 | alpha=90                     | beta=104.957(4)     | gamma=90    |
| Temperature:    | 100 K                        |                     |             |
|                 | Calculated                   | Reported            |             |
| Volume          | 6095.7(12)                   | 6095.5(13)          |             |
| Space group     | P 21/n                       | P 21/n              |             |
| Hall group      | -P 2yn                       | -P 2yn              |             |
| Moiety formula  | C58 H88 Ga N6 Na O4, C6 H6 ? |                     |             |
| Sum formula     | C64 H94 Ga N6 Na O4          | C64 H94 Ga N6 Na O4 |             |
| Mr              | 1104.16                      | 1104.16             |             |
| Dx,g cm-3       | 1.203                        | 1.203               |             |
| Z               | 4                            | 4                   |             |
| Mu (mm-1)       | 0.509                        | 0.509               |             |
| F000            | 2376.0                       | 2376.0              |             |
| F000'           | 2377.75                      |                     |             |
| h,k,lmax        | 16,22,28                     | 16,22,28            |             |
| Nref            | 10741                        | 10442               |             |
| Tmin,Tmax       | 0.880,0.975                  | 0.281,0.745         |             |
| Tmin'           | 0.841                        |                     |             |

Correction method= # Reported T Limits: Tmin=0.281 Tmax=0.745  
AbsCorr = MULTI-SCAN

Data completeness= 0.972      Theta(max)= 24.998

R(reflections)= 0.1491( 6751)      wR2(reflections)= 0.3468( 10442)

S = 1.055      Npar= 724

---

The following ALERTS were generated. Each ALERT has the format  
**test-name\_ALERT\_alert-type\_alert-level.**  
Click on the hyperlinks for more details of the test.

---

### ● Alert level C

RINTA01\_ALERT\_3\_C The value of Rint is greater than 0.12  
Rint given 0.132

|                   |                                                  |         |        |
|-------------------|--------------------------------------------------|---------|--------|
| PLAT020_ALERT_3_C | The Value of Rint is Greater Than 0.12 .....     | 0.132   | Report |
| PLAT029_ALERT_3_C | _diffn_measured_fraction_theta_full value Low .  | 0.972   | Why?   |
| PLAT082_ALERT_2_C | High R1 Value .....                              | 0.15    | Report |
| PLAT084_ALERT_3_C | High wR2 Value (i.e. > 0.25) .....               | 0.35    | Report |
| PLAT213_ALERT_2_C | Atom C1 has ADP max/min Ratio .....              | 3.2     | oblate |
| PLAT213_ALERT_2_C | Atom C3 has ADP max/min Ratio .....              | 4.0     | oblate |
| PLAT213_ALERT_2_C | Atom C5 has ADP max/min Ratio .....              | 3.3     | oblate |
| PLAT213_ALERT_2_C | Atom C7 has ADP max/min Ratio .....              | 3.4     | prolat |
| PLAT213_ALERT_2_C | Atom C13 has ADP max/min Ratio .....             | 3.4     | prolat |
| PLAT213_ALERT_2_C | Atom C54 has ADP max/min Ratio .....             | 3.3     | oblate |
| PLAT220_ALERT_2_C | Non-Solvent Resd 1 C Ueq(max)/Ueq(min) Range     | 4.8     | Ratio  |
| PLAT222_ALERT_3_C | Non-Solv. Resd 1 H Uiso(max)/Uiso(min) Range     | 5.0     | Ratio  |
| PLAT341_ALERT_3_C | Low Bond Precision on C-C Bonds .....            | 0.01306 | Ang.   |
| PLAT601_ALERT_2_C | Structure Contains Solvent Accessible VOIDS of . | 39      | Ang**3 |

---

### ● Alert level G

|                   |                                                                                  |        |              |
|-------------------|----------------------------------------------------------------------------------|--------|--------------|
| PLAT002_ALERT_2_G | Number of Distance or Angle Restraints on AtSite                                 | 12     | Note         |
| PLAT003_ALERT_2_G | Number of Uiso or Uij Restrained non-H Atoms ...                                 | 17     | Report       |
| PLAT072_ALERT_2_G | SHELXL First Parameter in WGHT Unusually Large                                   | 0.14   | Report       |
| PLAT083_ALERT_2_G | SHELXL Second Parameter in WGHT Unusually Large                                  | 101.49 | Why ?        |
| PLAT171_ALERT_4_G | The CIF-Embedded .res File Contains EADP Records                                 | 6      | Report       |
| PLAT176_ALERT_4_G | The CIF-Embedded .res File Contains SADI Records                                 | 14     | Report       |
| PLAT186_ALERT_4_G | The CIF-Embedded .res File Contains ISOR Records                                 | 2      | Report       |
| PLAT302_ALERT_4_G | Anion/Solvent/Minor-Residue Disorder (Resd 2 )                                   | 100%   | Note         |
| PLAT302_ALERT_4_G | Anion/Solvent/Minor-Residue Disorder (Resd 3 )                                   | 100%   | Note         |
| PLAT304_ALERT_4_G | Non-Integer Number of Atoms in ..... Resd 2                                      | 7.49   | Check        |
| PLAT304_ALERT_4_G | Non-Integer Number of Atoms in ..... Resd 3                                      | 4.51   | Check        |
| PLAT720_ALERT_4_G | Number of Unusual/Non-Standard Labels .....                                      | 18     | Note         |
| PLAT722_ALERT_1_G | Angle Calc 121.00, Rep 119.70 Dev...<br>C6S' -C1S' -H1SB 1.555 1.555 1.555 # 353 | 1.30   | Degree Check |
| PLAT860_ALERT_3_G | Number of Least-Squares Restraints .....                                         | 116    | Note         |

---

- 0 **ALERT level A** = Most likely a serious problem - resolve or explain  
0 **ALERT level B** = A potentially serious problem, consider carefully  
15 **ALERT level C** = Check. Ensure it is not caused by an omission or oversight  
14 **ALERT level G** = General information/check it is not something unexpected
- 1 **ALERT type 1** CIF construction/syntax error, inconsistent or missing data  
13 **ALERT type 2** Indicator that the structure model may be wrong or deficient  
7 **ALERT type 3** Indicator that the structure quality may be low  
8 **ALERT type 4** Improvement, methodology, query or suggestion  
0 **ALERT type 5** Informative message, check
- 
-

It is advisable to attempt to resolve as many as possible of the alerts in all categories. Often the minor alerts point to easily fixed oversights, errors and omissions in your CIF or refinement strategy, so attention to these fine details can be worthwhile. In order to resolve some of the more serious problems it may be necessary to carry out additional measurements or structure refinements. However, the purpose of your study may justify the reported deviations and the more serious of these should normally be commented upon in the discussion or experimental section of a paper or in the "special\_details" fields of the CIF. checkCIF was carefully designed to identify outliers and unusual parameters, but every test has its limitations and alerts that are not important in a particular case may appear. Conversely, the absence of alerts does not guarantee there are no aspects of the results needing attention. It is up to the individual to critically assess their own results and, if necessary, seek expert advice.

### **Publication of your CIF in IUCr journals**

A basic structural check has been run on your CIF. These basic checks will be run on all CIFs submitted for publication in IUCr journals (*Acta Crystallographica*, *Journal of Applied Crystallography*, *Journal of Synchrotron Radiation*); however, if you intend to submit to *Acta Crystallographica Section C* or *E* or *IUCrData*, you should make sure that full publication checks are run on the final version of your CIF prior to submission.

### **Publication of your CIF in other journals**

Please refer to the *Notes for Authors* of the relevant journal for any special instructions relating to CIF submission.

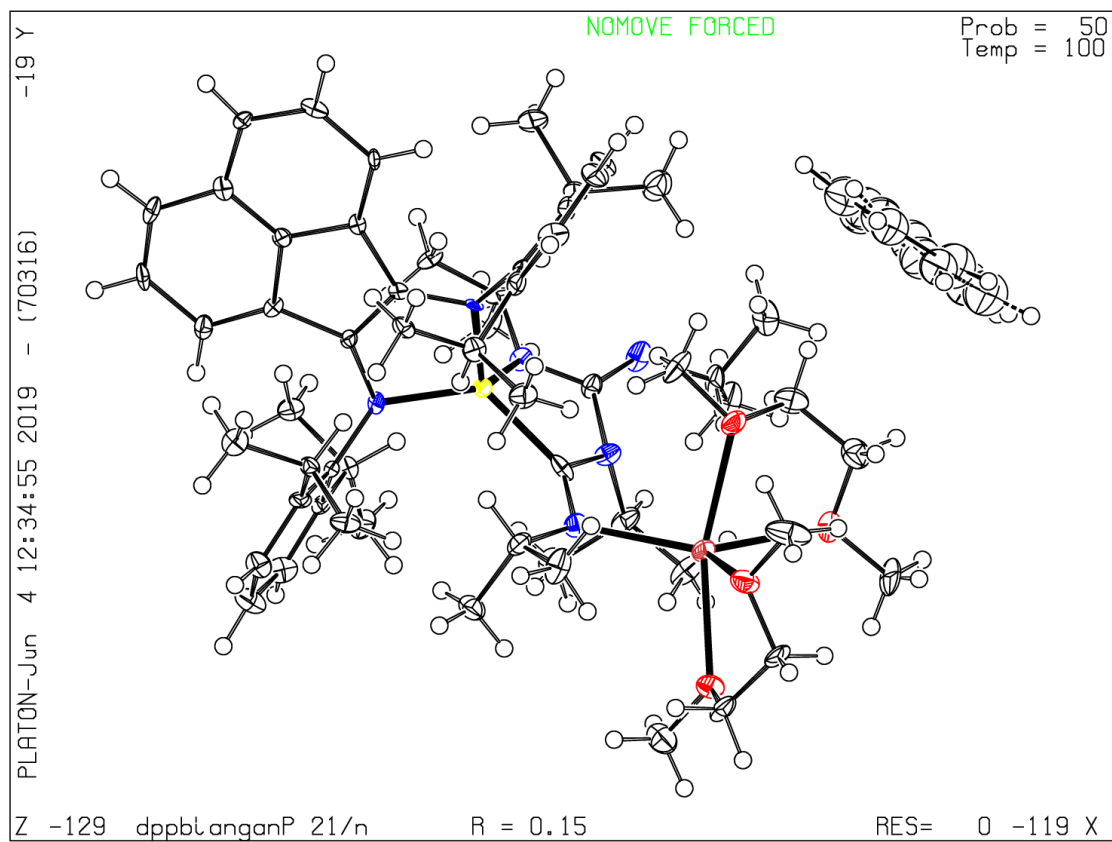

Supplement: d0cc03270k4.pdf [file d0cc03270k4.pdf]
